# Supplementary material for: A conditionally replication-defective cytomegalovirus vaccine elicits potent and diverse functional monoclonal antibodies in a phase I clinical trial
Source: PubMed Central journal article supplement (PMC8172929; doi:10.1038/s41541-021-00342-3), 2021-06-02
Supplement: 41541_2021_342_MOESM1_ESM.pdf [file 41541_2021_342_MOESM1_ESM.pdf]

# Supplementary file

A conditionally replication-defective cytomegalovirus vaccine elicits potent and diverse functional monoclonal antibodies in a phase I clinical trial

Leike Li<sup>1</sup>, Daniel C. Freed<sup>2</sup>, Yaping Liu<sup>2</sup>, Fengsheng Li<sup>2</sup>, Diane F. Barrett<sup>3</sup>, Wei Xiong<sup>1</sup>, Xiaohua Ye<sup>1</sup>, Stuart P. Adler<sup>4</sup>, Richard E. Rupp<sup>3</sup>, Dai Wang<sup>2</sup>, Ningyan Zhang<sup>1\*</sup>, Tong-Ming Fu<sup>1,2\*</sup>, Zhiqiang An<sup>1\*</sup>

<sup>1</sup>Texas Therapeutics Institute, Brown Foundation Institute of Molecular Medicine, University of Texas Health Science Center at Houston, Houston, TX 77030, USA

<sup>2</sup>Department of Infectious Diseases and Vaccines Research, Merck Research Laboratories, Merck and Co. Inc., Kenilworth, NJ 07033, USA

<sup>3</sup>Sealy Institute for Vaccine Sciences, The University of Texas Medical Branch, Galveston, TX 77555, USA

<sup>4</sup>Department of Microbiology and Immunology, School of Medicine, Virginia Commonwealth University, Richmond, VA 23298, USA

\* Ningyan Zhang, Tong-Ming Fu, Zhiqiang An

Email: [ningyan.zhang@uth.tmc.edu](mailto:ningyan.zhang@uth.tmc.edu); [tong-ming.fu@uth.tmc.edu](mailto:tong-ming.fu@uth.tmc.edu); [zhiqiang.an@uth.tmc.edu](mailto:zhiqiang.an@uth.tmc.edu)

## Contents

**Supplementary Figure 1**

**Supplementary Figure 2**

**Supplementary Figure 3**

**Supplementary Table 1**

**Supplementary Table 2**

**Supplementary Table 3**

**Supplementary Table 4**

**Supplementary Table 5**

**Supplementary Table 6**

**Supplementary Dataset**

**Reference**

## Supplementary Figures

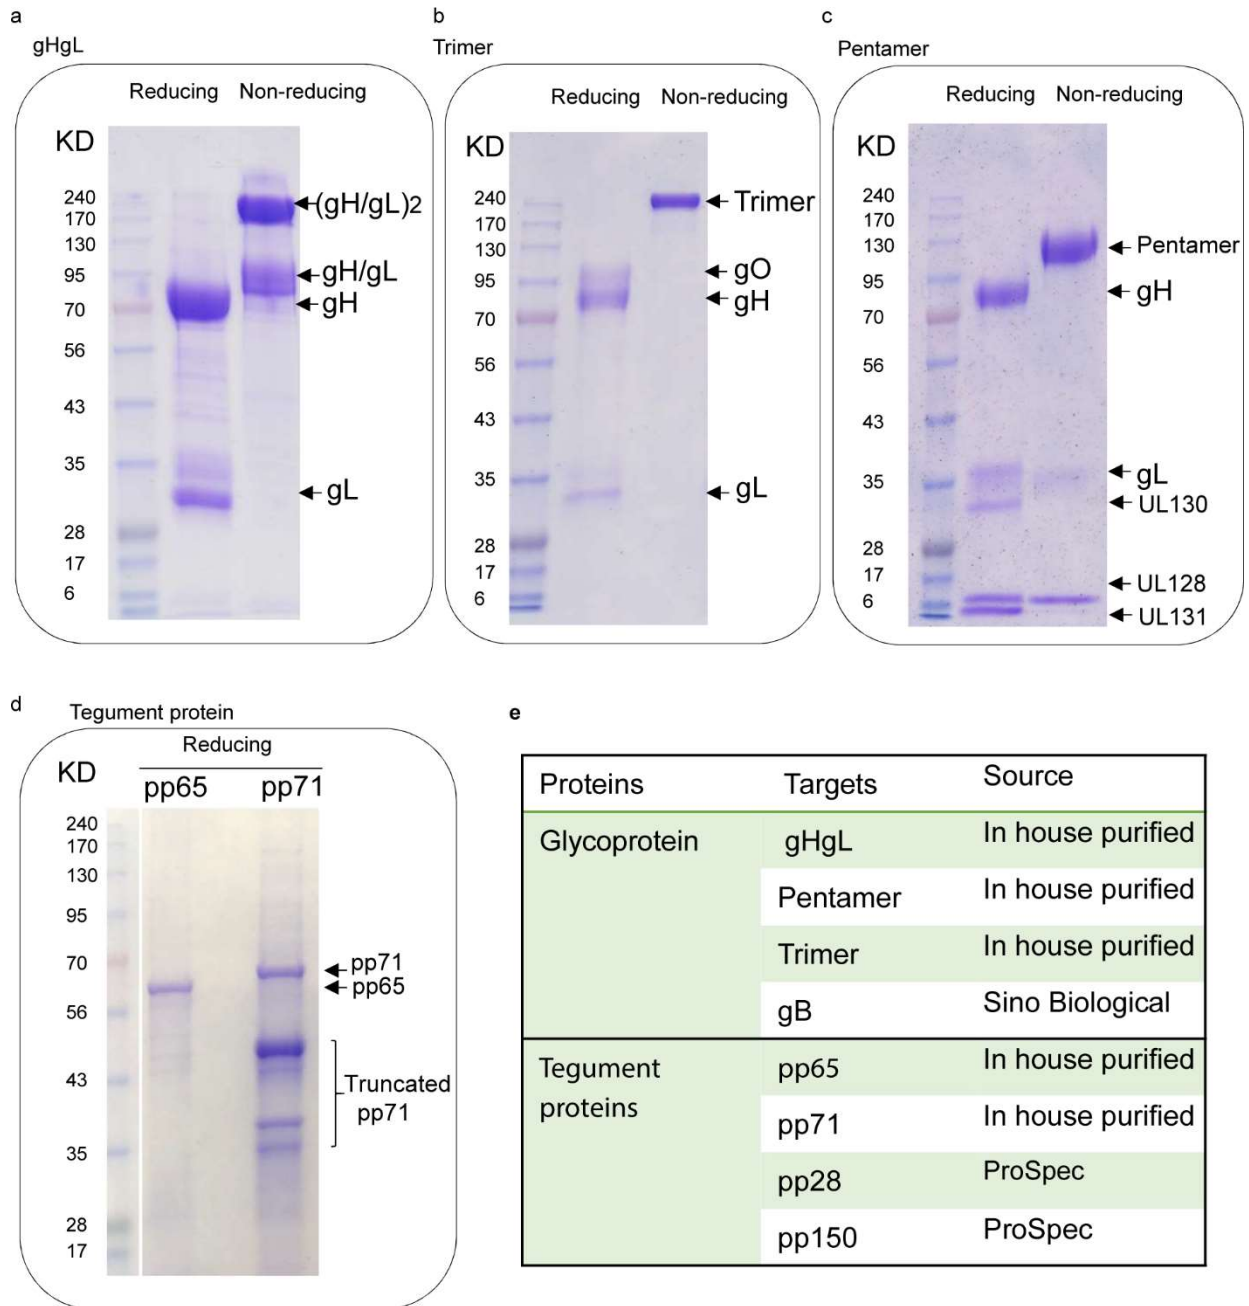

**Supplementary Fig. 1. Expression and purification of HCMV glycoproteins and tegument proteins.** The SDS-PAGE of purified HCMV antigens. HCMV glycoproteins gHgL, trimer, and pentamer were expressed in Expi293F cells, and tegument proteins pp65 and PP71 were expressed in *E. coli* BL21. The SDS-PAGE assay was performed in either reducing or non-reducing conditions. **a** HCMV gHgL and gHgL dimer. **b** HCMV trimer. **c** HCMV pentamer. **d** HCMV tegument proteins pp65 and pp71. **e** The list of the antigens used in the study and three

antigens (gB, pp28, and pp150) were purchased from the indicated vendors. The gel pictures were derived from the same experiment and were processed in parallel.

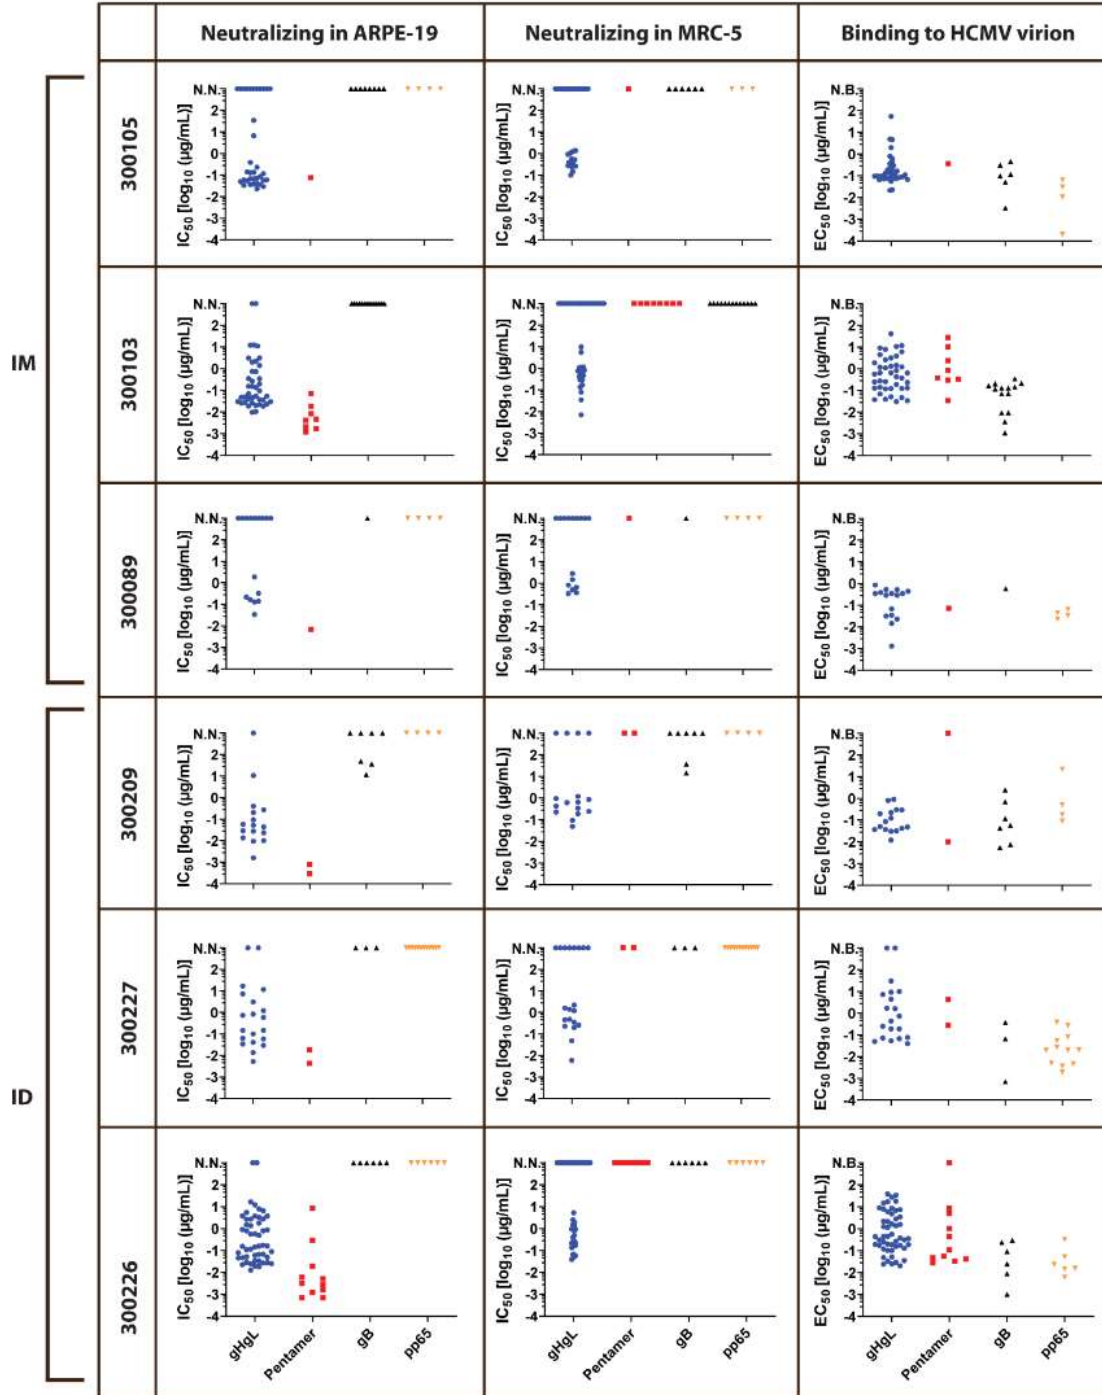

**Supplementary Fig. 2. Functional attributes of the HCMV antibodies based on the antigen specificity in each subject.** The  $IC_{50}$  of mAbs were grouped based on their antigen specificity for their neutralizing potency in ARPE-19 cells (left column) and MRC-5 (middle column) as indicated. The binding affinity of the antibodies to HCMV virion ( $EC_{50}$ ) (right column). The  $IC_{50}$  of antibodies is defined as the concentration of the IgG required to block 50% viral entry into ARPE-19 or MRC-5 cells. The  $EC_{50}$  of antibodies is defined as the concentration of the IgG required to achieve 50% of the maximal binding signals in virus-specific ELISA. N.N. indicates no neutralizing activity. N.B. indicates no binding to the HCMV virion. IM, intramuscular injection; ID, intradermal injection.

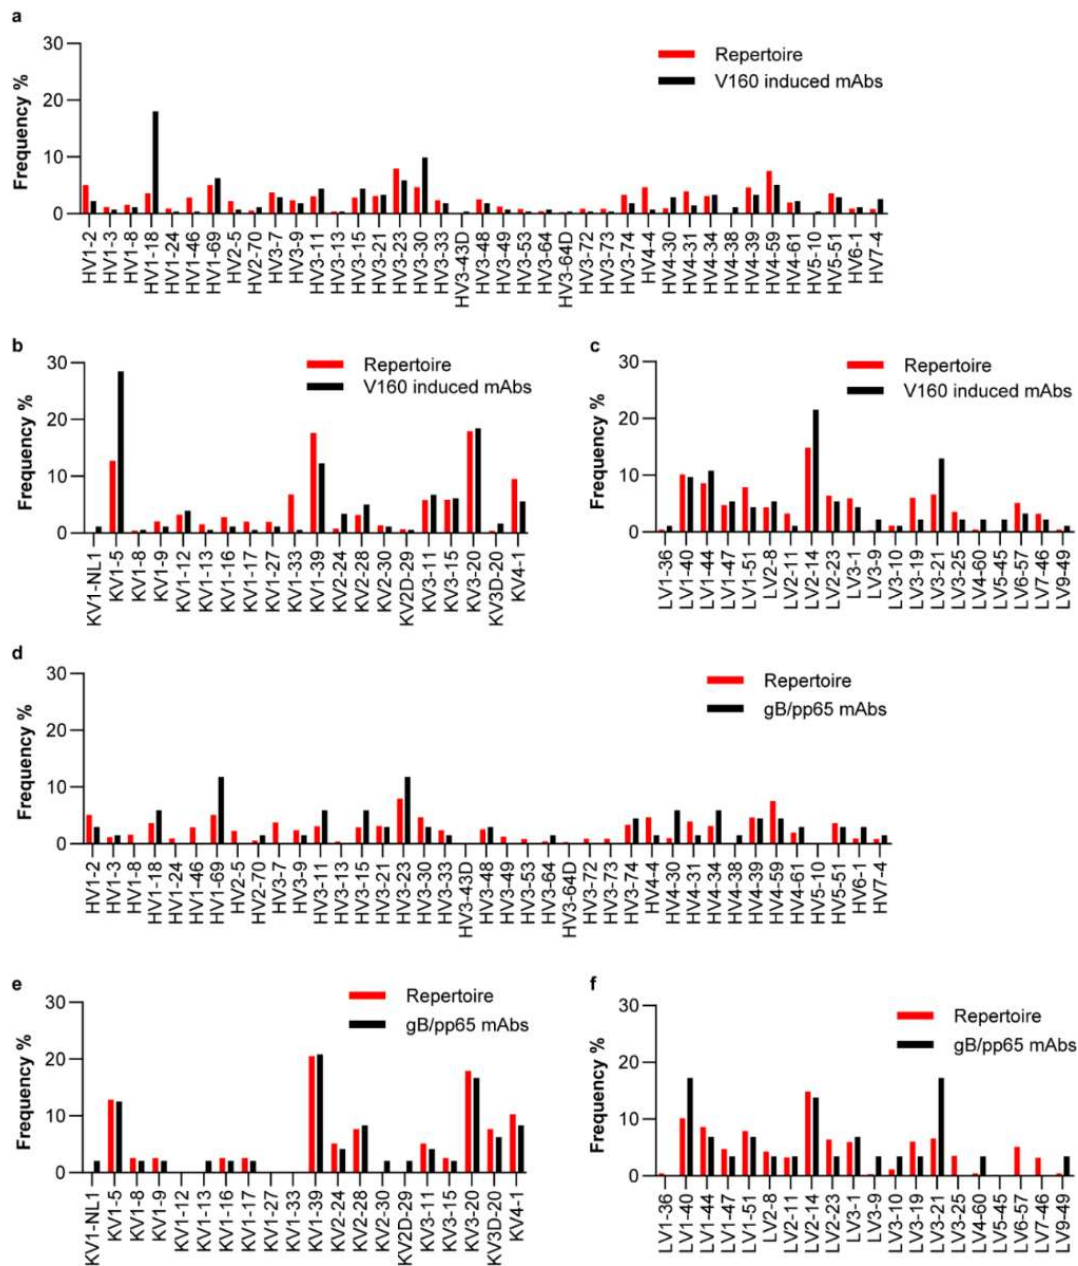

### Supplementary Fig. 3. The germline usage of V160 induced antibodies

The black bars indicate the antibodies isolated in this study. The red bars indicate the naive human antibody repertoire from previous study<sup>1</sup>. **a** The heavy chain germline usage of V160 induced mAb. **b** The kappa chain germline usage of V160 induced mAb. **c** The lambda chain germline usage of V160 induced mAb. **d** The heavy chain germline usage of gB and pp65 mAb. **e** The kappa chain germline usage of gB and pp65 mAb. **f** The lambda chain germline usage of gB and pp65 mAb.

## Supplementary Tables

**Supplementary Table 1. Subject profiles**

|                                                   | Vaccinated subjects |        |        |        |        |        | HCMV sero-positive subjects |           |           |
|---------------------------------------------------|---------------------|--------|--------|--------|--------|--------|-----------------------------|-----------|-----------|
| Subject                                           | 300105              | 300103 | 300089 | 300209 | 300227 | 300226 | HCMV+ (1)                   | HCMV+ (2) | HCMV+ (3) |
| Sex <sup>1</sup>                                  | M                   | M      | F      | F      | M      | M      | n/a                         | n/a       | n/a       |
| Age                                               | 40s                 | 20s    | 20s    | 20s    | 20s    | 20s    | n/a                         | n/a       | n/a       |
| Administration route <sup>2</sup>                 | IM                  | IM     | IM     | ID     | ID     | ID     | n/a                         | n/a       | n/a       |
| Baseline serum titer <sup>3</sup> ,<br>In ARPE-19 | 33                  | N.N.   | N.N.   | N.N.   | N.N.   | N.N.   | n/a                         | n/a       | n/a       |
| Baseline serum titer <sup>3</sup> ,<br>In MRC-5   | 35                  | N.N.   | N.N.   | N.N.   | N.N.   | N.N.   | n/a                         | n/a       | n/a       |
| Serum titer <sup>4</sup> ,<br>In ARPE-19          | 695                 | 15474  | 2844   | 7260   | 8693   | 16726  | 5562                        | 7406      | 20007     |
| Serum titer <sup>4</sup> ,<br>In MRC-5            | 425                 | 8044   | 2552   | 3224   | 3500   | 11713  | 1158                        | 2837      | 3572      |

<sup>1</sup>M, male; F, female;

<sup>2</sup>IM, intramuscular injection; ID, intradermal injection;

<sup>3</sup>titer at months 0 for the vaccinated subjects; N.N. indicates no neutralizing activity

<sup>4</sup>titer at months 7 for the vaccinated subjects. For sero-positive subjects, the titers were detected at the time of enrollment.

n/a, not applicable.

**Supplementary Table 2.** Summary of single memory B cell culturing and antibody cloning

|                                        | Vaccinated subjects |        |        |        |        |        |                  |                  |           |
|----------------------------------------|---------------------|--------|--------|--------|--------|--------|------------------|------------------|-----------|
| Subject                                | 300105              | 300103 | 300089 | 300209 | 300227 | 300226 | HCMV+ (1)        | HCMV+ (2)        | HCMV+ (3) |
| Number of culture wells                | 64,000              | 64,000 | 64,000 | 64,000 | 64,000 | 64,000 | 64,000           | n/a <sup>1</sup> | 64,000    |
| Estimated IgG positive wells           | 46.8%               | 57.4%  | 50.7%  | 42.9%  | 42.3%  | 59.7%  | 19.2%            | 32.6%            | 30.0%     |
| Memory B cell culture supernatant hits |                     |        |        |        |        |        |                  |                  |           |
| Neutralizing supernatants              | 41                  | 103    | 30     | 26     | 27     | 59     | 40               | 12               | 173       |
| Virion ELISA binding supernatants      | 313                 | 250    | 204    | 137    | 109    | 215    | 185              | 56               | 318       |
| Cloned antibodies                      |                     |        |        |        |        |        |                  |                  |           |
| Neutralizing antibodies                | 29                  | 59     | 13     | 26     | 24     | 70     | n/c <sup>2</sup> | n/c              | n/c       |
| Binding antibodies                     | 25                  | 19     | 18     | 10     | 18     | 21     | n/c              | n/c              | n/c       |

<sup>1</sup> n/a, not applicable, not counted due to cell contamination;

<sup>2</sup> n/c, not cloned.

**Supplementary Table 3. Functional and genetic properties of V160 induced antibodies**

| mAb | Subject | Target                | Neutralization-IC50<br>(µg/ml) |                   | Binding-<br>EC50<br>(µg/ml)<br>HCMV<br>Virion | Binding-OD450 |          |        |                   |      |      |      |       | Germline |             |
|-----|---------|-----------------------|--------------------------------|-------------------|-----------------------------------------------|---------------|----------|--------|-------------------|------|------|------|-------|----------|-------------|
|     |         |                       | ARPE-<br>19                    | MRC-5             |                                               | Trimer        | Pentamer | gHgL   | gB                | pp65 | pp28 | pp71 | pp150 | Heavy    | Light       |
| 1   | 300105  | gHgL                  | 0.1343                         | 0.2951            | 0.1116                                        | 1.9258        | 2.0241   | 1.2879 | N.B. <sup>2</sup> | N.B. | N.B. | N.B. | N.B.  | HV1-18   | KV1-5       |
| 2   | 300105  | gHgL                  | 0.0602                         | 0.5138            | 0.0713                                        | 0.9854        | 1.5548   | 1.1689 | N.B.              | N.B. | N.B. | N.B. | N.B.  | HV1-18   | KV1-12      |
| 3   | 300105  | gHgL                  | 0.0846                         | 0.5641            | 0.0838                                        | 1.4587        | 1.2548   | 1.0868 | N.B.              | N.B. | N.B. | N.B. | N.B.  | HV3-9    | KV1-5       |
| 4   | 300105  | gHgL                  | 0.0405                         | 0.263             | 0.0949                                        | 1.6987        | 1.7471   | 1.7539 | N.B.              | N.B. | N.B. | N.B. | N.B.  | HV1-18   | KV1-5       |
| 5   | 300105  | gHgL                  | 0.0232                         | 0.1021            | 0.1312                                        | 0.9863        | 1.115    | 1.3614 | N.B.              | N.B. | N.B. | N.B. | N.B.  | HV3-11   | KV3-11      |
| 6   | 300105  | Pentamer-<br>specific | 0.0771                         | N.N. <sup>1</sup> | 0.3613                                        | N.B.          | 1.2548   | N.B.   | N.B.              | N.B. | N.B. | N.B. | N.B.  | HV1-18   | KV2D-<br>29 |
| 7   | 300105  | gHgL                  | 0.0366                         | N.N.              | 0.0654                                        | 1.5698        | 1.5078   | 1.5117 | N.B.              | N.B. | N.B. | N.B. | N.B.  | HV1-18   | KV1-5       |
| 8   | 300105  | gHgL                  | 0.1168                         | 0.279             | 0.1089                                        | 0.9865        | 1.3676   | 1.0416 | N.B.              | N.B. | N.B. | N.B. | N.B.  | HV1-18   | KV1-5       |
| 9   | 300105  | gHgL                  | 0.0385                         | 1.3676            | 0.0893                                        | 1.3654        | 1.4019   | 1.8351 | N.B.              | N.B. | N.B. | N.B. | N.B.  | HV1-18   | KV1-27      |
| 10  | 300105  | gHgL                  | 0.037                          | 0.2972            | 0.0853                                        | 1.8449        | 2.0154   | 1.8198 | N.B.              | N.B. | N.B. | N.B. | N.B.  | HV3-7    | KV1-39      |
| 11  | 300105  | gHgL                  | 0.0577                         | 1.3               | 0.0908                                        | 1.0258        | 1.8521   | 1.3719 | N.B.              | N.B. | N.B. | N.B. | N.B.  | HV1-18   | KV1-5       |
| 12  | 300105  | gHgL                  | 0.1293                         | N.N.              | 0.4576                                        | 1.3584        | 1.1772   | 1.4739 | N.B.              | N.B. | N.B. | N.B. | N.B.  | HV3-30   | LV2-23      |
| 13  | 300105  | gHgL                  | 0.0338                         | 0.3932            | 0.1317                                        | 1.6854        | 1.5765   | 1.594  | N.B.              | N.B. | N.B. | N.B. | N.B.  | HV4-59   | KV3-20      |
| 14  | 300105  | gHgL                  | 0.1417                         | 0.9264            | 0.1632                                        | 1.5632        | 1.8078   | 1.7853 | N.B.              | N.B. | N.B. | N.B. | N.B.  | HV1-18   | KV1-5       |
| 15  | 300105  | gHgL                  | 0.067                          | 0.405             | 0.0802                                        | 1.3564        | 1.9242   | 1.8944 | N.B.              | N.B. | N.B. | N.B. | N.B.  | HV1-18   | KV1-12      |
| 16  | 300105  | gHgL                  | 0.0549                         | 0.3737            | 0.0796                                        | 1.5632        | 1.2874   | 1.6324 | N.B.              | N.B. | N.B. | N.B. | N.B.  | HV1-18   | KV1-5       |
| 17  | 300105  | gHgL                  | 0.2312                         | 1.1742            | 0.1822                                        | 1.1254        | 1.3794   | 1.4573 | N.B.              | N.B. | N.B. | N.B. | N.B.  | HV1-18   | KV1-5       |
| 19  | 300105  | gHgL                  | 0.0683                         | 0.2417            | 0.0999                                        | 1.9658        | 1.8818   | 1.7859 | N.B.              | N.B. | N.B. | N.B. | N.B.  | HV1-18   | KV1-5       |
| 20  | 300105  | gHgL                  | 6.6667                         | N.N.              | 1.967                                         | 0.8932        | 1.1012   | 1.0205 | N.B.              | N.B. | N.B. | N.B. | N.B.  | HV3-30   | LV3-21      |
| 21  | 300105  | gHgL                  | 0.0292                         | N.N.              | 0.2702                                        | 1.2365        | 1.7394   | 1.6563 | N.B.              | N.B. | N.B. | N.B. | N.B.  | HV3-33   | KV1-39      |
| 22  | 300105  | gHgL                  | 0.0723                         | N.N.              | 0.0711                                        | 2.2027        | 2.5555   | 2.0856 | N.B.              | N.B. | N.B. | N.B. | N.B.  | HV1-18   | KV1-5       |
| 23  | 300105  | gHgL                  | 0.3849                         | N.N.              | 0.2007                                        | 0.8622        | 0.5439   | 0.9338 | N.B.              | N.B. | N.B. | N.B. | N.B.  | HV3-15   | KV2-24      |
| 24  | 300105  | gHgL                  | 0.0498                         | 0.1467            | 0.0554                                        | 1.2358        | 1.4857   | 1.4459 | N.B.              | N.B. | N.B. | N.B. | N.B.  | HV1-18   | KV1-5       |
| 25  | 300105  | gHgL                  | 0.0606                         | 1.0228            | 0.1748                                        | 2.7811        | 2.7311   | 2.1376 | N.B.              | N.B. | N.B. | N.B. | N.B.  | HV3-48   | KV3-20      |
| 26  | 300089  | gHgL                  | 0.2185                         | 0.3604            | 0.3836                                        | 1.8542        | 1.697    | 2.0958 | N.B.              | N.B. | N.B. | N.B. | N.B.  | HV7-4-1  | LV2-14      |
| 27  | 300089  | Pentamer-<br>specific | 0.0068                         | N.N.              | 0.0723                                        | N.B.          | 1.4947   | N.B.   | N.B.              | N.B. | N.B. | N.B. | N.B.  | HV7-4-1  | LV3-25      |
| 36  | 300089  | gHgL                  | 0.3236                         | 0.6426            | 0.2914                                        | 1.4251        | 1.3224   | 1.5837 | N.B.              | N.B. | N.B. | N.B. | N.B.  | HV1-18   | LV7-46      |
| 37  | 300089  | gHgL                  | 0.1297                         | 0.3287            | 0.2891                                        | 1.6986        | 1.9178   | 1.9501 | N.B.              | N.B. | N.B. | N.B. | N.B.  | HV4-31   | KV3-20      |
| 41  | 300089  | gHgL                  | 1.8631                         | 2.778             | 0.8502                                        | 1.5627        | 1.5839   | 1.6428 | N.B.              | N.B. | N.B. | N.B. | N.B.  | HV1-2    | LV2-14      |
| 42  | 300089  | gHgL                  | 0.139                          | N.N.              | 0.3463                                        | 1.1247        | 0.8462   | 0.9408 | N.B.              | N.B. | N.B. | N.B. | N.B.  | HV3-33   | KV1-39      |
| 43  | 300089  | gHgL                  | 0.1626                         | 0.5009            | 0.3448                                        | 1.3652        | 1.5967   | 1.5666 | N.B.              | N.B. | N.B. | N.B. | N.B.  | HV4-31   | KV3-20      |
| 56  | 300089  | gHgL                  | 0.0337                         | N.N.              | 0.0675                                        | 1.3654        | 1.2501   | 1.4774 | N.B.              | N.B. | N.B. | N.B. | N.B.  | HV1-46   | KV4-1       |
| 59  | 300105  | gHgL                  | N.N.                           | N.N.              | 4.86                                          | 1.0666        | 0.9681   | 0.893  | N.B.              | N.B. | N.B. | N.B. | N.B.  | HV3-7    | LV2-14      |
| 62  | 300105  | gHgL                  | N.N.                           | N.N.              | 0.0733                                        | 0.4986        | 0.656    | 0.3248 | N.B.              | N.B. | N.B. | N.B. | N.B.  | HV3-21   | KV3-20      |
| 65  | 300105  | gB                    | N.N.                           | N.N.              | 0.0033                                        | N.B.          | N.B.     | N.B.   | 2.3156            | N.B. | N.B. | N.B. | N.B.  | HV4-59   | KV4-1       |
| 69  | 300105  | gHgL                  | N.N.                           | N.N.              | 0.3627                                        | 0.5976        | 0.446    | 0.2954 | N.B.              | N.B. | N.B. | N.B. | N.B.  | HV3-48   | LV1-44      |



|     |        |                   |        |        |        |        |        |        |        |        |        |      |      |          |        |
|-----|--------|-------------------|--------|--------|--------|--------|--------|--------|--------|--------|--------|------|------|----------|--------|
| 71  | 300105 | gHgL              | N.N.   | N.N.   | 53.74  | 1.1164 | 1.1398 | 1.1591 | N.B.   | N.B.   | N.B.   | N.B. | N.B. | HV1-18   | KV1-5  |
| 80  | 300105 | gHgL              | N.N.   | N.N.   | 0.2919 | 0.971  | 0.9936 | 1.532  | N.B.   | N.B.   | N.B.   | N.B. | N.B. | HV5-51   | LV3-1  |
| 83  | 300105 | gHgL              | N.N.   | N.N.   | 0.0986 | 0.9684 | 1.2667 | 1.0829 | N.B.   | N.B.   | N.B.   | N.B. | N.B. | HV3-30   | LV2-14 |
| 84  | 300105 | gHgL              | N.N.   | N.N.   | 0.0676 | 1.6623 | 1.6253 | 0.9039 | N.B.   | N.B.   | N.B.   | N.B. | N.B. | HV4-59   | KV1-39 |
| 104 | 300089 | gHgL              | N.N.   | N.N.   | 0.0344 | 0.0805 | 0.0663 | 0.0971 | N.B.   | N.B.   | N.B.   | N.B. | N.B. | HV3-74   | LV6-57 |
| 119 | 300089 | gB                | N.N.   | N.N.   | 0.577  | N.B.   | N.B.   | N.B.   | 1.1959 | N.B.   | N.B.   | N.B. | N.B. | HV7-4-1  | LV3-10 |
| 122 | 300089 | gHgL              | N.N.   | N.N.   | 0.5303 | 0.3038 | 0.2543 | 0.3997 | N.B.   | N.B.   | N.B.   | N.B. | N.B. | HV3-30   | KV3-15 |
| 123 | 300089 | gHgL              | N.N.   | N.N.   | 0.0143 | 0.1759 | 0.259  | 0.6568 | N.B.   | N.B.   | N.B.   | N.B. | N.B. | HV3-53   | KV1-5  |
| 129 | 300089 | gHgL              | N.N.   | N.N.   | 0.0227 | 0.0853 | 0.0797 | 0.1138 | N.B.   | N.B.   | N.B.   | N.B. | N.B. | HV3-7    | KV2-30 |
| 132 | 300089 | gHgL              | N.N.   | N.N.   | 0.0316 | 0.0885 | 0.0765 | 0.0797 | N.B.   | N.B.   | N.B.   | N.B. | N.B. | HV3-64   | LV6-57 |
| 134 | 300089 | pp65              | N.N.   | N.N.   | 0.0337 | N.B.   | N.B.   | N.B.   | N.B.   | 0.8112 | N.B.   | N.B. | N.B. | HV3-11   | KV2-24 |
| 136 | 300089 | pp65              | N.N.   | N.N.   | 0.0444 | N.B.   | N.B.   | N.B.   | N.B.   | 2.1853 | N.B.   | N.B. | N.B. | HV3-11   | KV2-24 |
| 138 | 300089 | pp65              | N.N.   | N.N.   | 0.0633 | N.B.   | N.B.   | N.B.   | N.B.   | 1.2116 | N.B.   | N.B. | N.B. | HV3-74   | LV3-1  |
| 139 | 300089 | gHgL              | N.N.   | N.N.   | 0.5196 | 0.0798 | 0.1693 | 0.2413 | N.B.   | N.B.   | N.B.   | N.B. | N.B. | HV2-5    | KV1-5  |
| 140 | 300089 | pp65              | N.N.   | N.N.   | 0.0229 | N.B.   | N.B.   | N.B.   | N.B.   | 1.2907 | N.B.   | N.B. | N.B. | HV3-48   | LV1-40 |
| 143 | 300089 | pp28              | N.N.   | N.N.   | 0.035  | N.B.   | N.B.   | N.B.   | N.B.   | N.B.   | 1.5015 | N.B. | N.B. | HV3-15   | KV2-28 |
| 147 | 300089 | gHgL              | N.N.   | 1.453  | 0.4394 | 1.1125 | 1.196  | 1.3012 | N.B.   | N.B.   | N.B.   | N.B. | N.B. | HV7-4-1  | KV1-5  |
| 150 | 300089 | gHgL              | N.N.   | 0.8143 | 0.3445 | 2.2725 | 2.8748 | 1.6702 | N.B.   | N.B.   | N.B.   | N.B. | N.B. | HV1-2    | LV2-23 |
| 151 | 300105 | gB                | N.N.   | N.N.   | 0.0985 | N.B.   | N.B.   | N.B.   | 1.1442 | N.B.   | N.B.   | N.B. | N.B. | HV1-69   | LV2-23 |
| 153 | 300105 | gHgL              | N.N.   | N.N.   | 0.6194 | 1.1827 | 1.5795 | 0.9176 | N.B.   | N.B.   | N.B.   | N.B. | N.B. | HV4-39   | LV2-14 |
| 160 | 300105 | gHgL              | N.N.   | N.N.   | 0.7793 | 0.9775 | 0.9344 | 0.9562 | N.B.   | N.B.   | N.B.   | N.B. | N.B. | HV1-8    | KV4-1  |
| 161 | 300105 | pp65              | N.N.   | N.N.   | 0.0638 | N.B.   | N.B.   | N.B.   | N.B.   | 1.3026 | N.B.   | N.B. | N.B. | HV3-23   | LV2-8  |
| 162 | 300105 | gHgL              | N.N.   | N.N.   | 0.0209 | 0.9712 | 1.0715 | 1.1102 | N.B.   | N.B.   | N.B.   | N.B. | N.B. | HV3-13   | LV2-14 |
| 165 | 300105 | gB                | N.N.   | N.N.   | 0.4534 | N.B.   | N.B.   | N.B.   | 2.362  | N.B.   | N.B.   | N.B. | N.B. | HV1-69   | KV4-1  |
| 166 | 300105 | gHgL              | N.N.   | N.N.   | 0.0226 | 0.89   | 1.0972 | 1.3203 | N.B.   | N.B.   | N.B.   | N.B. | N.B. | HV3-21   | KV3-15 |
| 169 | 300105 | pp65              | N.N.   | N.N.   | 0.0002 | N.B.   | N.B.   | N.B.   | N.B.   | 1.2339 | N.B.   | N.B. | N.B. | HV1-18   | LV2-11 |
| 170 | 300105 | pp65              | N.N.   | N.N.   | 0.0306 | N.B.   | N.B.   | N.B.   | N.B.   | 1.4267 | N.B.   | N.B. | N.B. | HV4-59   | LV1-51 |
| 171 | 300105 | gB                | N.N.   | N.N.   | 0.1162 | N.B.   | N.B.   | N.B.   | 1.1549 | N.B.   | N.B.   | N.B. | N.B. | HV1-2    | LV3-21 |
| 172 | 300105 | gB                | N.N.   | N.N.   | 0.3076 | N.B.   | N.B.   | N.B.   | 1.1607 | N.B.   | N.B.   | N.B. | N.B. | HV5-51   | LV2-14 |
| 173 | 300105 | pp65              | N.N.   | N.N.   | 0.0104 | N.B.   | N.B.   | N.B.   | N.B.   | 1.1611 | N.B.   | N.B. | N.B. | HV4-4    | KV1-5  |
| 175 | 300105 | gB                | N.N.   | N.N.   | 0.0507 | N.B.   | N.B.   | N.B.   | 1.15   | N.B.   | N.B.   | N.B. | N.B. | HV3-74   | LV9-49 |
| 201 | 300105 | gHgL              | 34.459 | N.N.   | 4.606  | 0.3734 | 0.8786 | 0.2864 | N.B.   | N.B.   | N.B.   | N.B. | N.B. | HV3-30   | KV1-33 |
| 238 | 300103 | gHgL              | 0.0543 | 0.1364 | 0.118  | 1.6548 | 1.5513 | 1.5574 | N.B.   | N.B.   | N.B.   | N.B. | N.B. | HV3-49   | LV3-25 |
| 239 | 300103 | gHgL              | 0.196  | 0.8194 | 0.6455 | 1.4665 | 0.7178 | 1.1616 | N.B.   | N.B.   | N.B.   | N.B. | N.B. | HV3-23   | KV3-20 |
| 240 | 300103 | gHgL              | 0.0258 | N.N.   | 0.6356 | 0.8996 | 1.1687 | 1.2477 | N.B.   | N.B.   | N.B.   | N.B. | N.B. | HV3-21   | KV3-15 |
| 242 | 300103 | gHgL              | 0.0549 | 0.2974 | 1.293  | 1.1254 | 0.7619 | 0.9105 | N.B.   | N.B.   | N.B.   | N.B. | N.B. | HV3-30   | KV1-5  |
| 244 | 300103 | gHgL              | 0.0255 | N.N.   | 0.0337 | 1.6542 | 1.0066 | 1.4561 | N.B.   | N.B.   | N.B.   | N.B. | N.B. | HV1-18   | KV1-5  |
| 247 | 300103 | gHgL              | 0.725  | 1.0506 | 1.879  | 0.9865 | 1.4225 | 1.4384 | N.B.   | N.B.   | N.B.   | N.B. | N.B. | HV3-30-3 | LV2-14 |
| 250 | 300103 | Pentamer-specific | 0.0012 | N.N.   | 0.0339 | N.B.   | 1.5218 | N.B.   | N.B.   | N.B.   | N.B.   | N.B. | N.B. | HV3-30-3 | KV1-39 |
| 251 | 300103 | gHgL              | 0.152  | 0.7505 | 1.225  | 1.6532 | 1.8851 | 1.7305 | N.B.   | N.B.   | N.B.   | N.B. | N.B. | HV4-34   | LV2-14 |
| 252 | 300103 | gHgL              | 0.0305 | N.N.   | 0.127  | 1.3279 | 1.5562 | 1.6565 | N.B.   | N.B.   | N.B.   | N.B. | N.B. | HV1-18   | KV1-5  |

|     |        |                   |         |          |        |         |        |        |        |      |      |      |      |          |        |
|-----|--------|-------------------|---------|----------|--------|---------|--------|--------|--------|------|------|------|------|----------|--------|
| 256 | 300103 | gHgL              | 1.4     | 0.5109   | 0.8316 | 1.3654  | 0.993  | 1.3442 | N.B.   | N.B. | N.B. | N.B. | N.B. | HV1-18   | KV3-15 |
| 257 | 300103 | gHgL              | 0.0279  | N.N.     | 0.0378 | 2.3485  | 0.9703 | 1.536  | N.B.   | N.B. | N.B. | N.B. | N.B. | HV1-18   | KV1-5  |
| 258 | 300103 | gHgL              | 0.0301  | 0.727    | 0.4311 | 1.32546 | 1.5498 | 1.5102 | N.B.   | N.B. | N.B. | N.B. | N.B. | HV4-59   | KV3-20 |
| 267 | 300103 | gHgL              | 0.0233  | N.N.     | 0.0509 | 1.2035  | 1.4355 | 1.5422 | N.B.   | N.B. | N.B. | N.B. | N.B. | HV4-39   | LV5-45 |
| 269 | 300103 | gHgL              | 0.0477  | N.N.     | 2.592  | 0.7805  | 0.9312 | 1.4128 | N.B.   | N.B. | N.B. | N.B. | N.B. | HV3-15   | KV2-28 |
| 279 | 300103 | gHgL              | 0.0378  | N.N.     | 0.5679 | 1.27    | 0.8804 | 1.2987 | N.B.   | N.B. | N.B. | N.B. | N.B. | HV3-23   | KV1-5  |
| 286 | 300103 | gHgL              | 0.347   | N.N.     | 1.455  | 1.9938  | 2.0042 | 1.4676 | N.B.   | N.B. | N.B. | N.B. | N.B. | HV3-73   | KV2-24 |
| 288 | 300103 | gHgL              | 0.0188  | N.N.     | 0.1865 | 1.7566  | 2.0188 | 1.3369 | N.B.   | N.B. | N.B. | N.B. | N.B. | HV3-15   | KV2-24 |
| 292 | 300103 | gHgL              | 3.09    | N.N.     | 3.878  | 2.7624  | 1.9533 | 3.0687 | N.B.   | N.B. | N.B. | N.B. | N.B. | HV3-21   | LV2-23 |
| 294 | 300103 | gHgL              | 12.1    | 0.07904  | 11.62  | 2.7392  | 2.4457 | 0.4979 | N.B.   | N.B. | N.B. | N.B. | N.B. | HV3-23   | KV3-20 |
| 295 | 300103 | gHgL              | 0.137   | 5.549    | 3.148  | 0.772   | 1.0566 | 1.0991 | N.B.   | N.B. | N.B. | N.B. | N.B. | HV3-15   | KV2-28 |
| 296 | 300103 | gHgL              | 0.0496  | N.N.     | 4.447  | 2.9639  | 1.9332 | 2.7824 | N.B.   | N.B. | N.B. | N.B. | N.B. | HV1-18   | KV2-28 |
| 297 | 300103 | gHgL              | 0.268   | 0.7935   | 0.275  | 1.5387  | 0.6768 | 0.9482 | N.B.   | N.B. | N.B. | N.B. | N.B. | HV3-7    | KV1-12 |
| 298 | 300103 | Pentamer-specific | 0.0047  | N.N.     | 2.35   | N.B.    | 1.7424 | N.B.   | N.B.   | N.B. | N.B. | N.B. | N.B. | HV1-18   | KV1-5  |
| 300 | 300103 | gHgL              | 0.0707  | 0.4165   | 0.1218 | 1.3695  | 1.6546 | 1.677  | N.B.   | N.B. | N.B. | N.B. | N.B. | HV1-18   | KV1-5  |
| 302 | 300103 | gHgL              | 0.0097  | 1.122    | 0.3753 | 1.2654  | 1.657  | 1.4695 | N.B.   | N.B. | N.B. | N.B. | N.B. | HV4-39   | LV3-9  |
| 303 | 300103 | gHgL              | 0.0454  | 1.153    | 0.1228 | 1.1298  | 1.4069 | 1.4968 | N.B.   | N.B. | N.B. | N.B. | N.B. | HV1-18   | KV1-5  |
| 305 | 300103 | Pentamer-specific | 0.0182  | N.N.     | 27.439 | N.B.    | 1.4016 | N.B.   | N.B.   | N.B. | N.B. | N.B. | N.B. | HV1-18   | KV1-13 |
| 312 | 300103 | gHgL              | 0.0201  | N.N.     | 0.0684 | 1.7075  | 0.7449 | 1.1014 | N.B.   | N.B. | N.B. | N.B. | N.B. | HV7-4-1  | KV1-5  |
| 315 | 300103 | Pentamer-specific | 0.0021  | N.N.     | 0.3345 | N.B.    | 0.6938 | N.B.   | N.B.   | N.B. | N.B. | N.B. | N.B. | HV3-30   | LV3-1  |
| 323 | 300089 | gHgL              | N.N.    | N.N.     | 0.0013 | 2.8057  | 2.612  | 2.2218 | N.B.   | N.B. | N.B. | N.B. | N.B. | HV3-64D  | LV7-46 |
| 327 | 300103 | gHgL              | 0.0187  | 0.4713   | 0.1308 | 1.9209  | 1.6469 | 1.5988 | N.B.   | N.B. | N.B. | N.B. | N.B. | HV3-15   | KV2-24 |
| 328 | 300103 | gHgL              | 0.0105  | 0.03507  | 0.0466 | 1.3657  | 1.7693 | 1.816  | N.B.   | N.B. | N.B. | N.B. | N.B. | HV1-18   | KV1-5  |
| 329 | 300103 | gHgL              | 0.0361  | N.N.     | 1.09   | 1.8311  | 2.4092 | 1.1092 | N.B.   | N.B. | N.B. | N.B. | N.B. | HV3-21   | KV1-5  |
| 332 | 300103 | gHgL              | 0.0406  | 0.1685   | 0.2479 | 2.284   | 0.9611 | 1.5285 | N.B.   | N.B. | N.B. | N.B. | N.B. | HV3-49   | KV1-12 |
| 334 | 300103 | Pentamer-specific | 0.0085  | N.N.     | 10.655 | N.B.    | 2.0672 | N.B.   | N.B.   | N.B. | N.B. | N.B. | N.B. | HV3-30   | LV2-8  |
| 345 | 300103 | gHgL              | 0.745   | 0.2887   | 0.2567 | 1.1387  | 0.9503 | 1.3831 | N.B.   | N.B. | N.B. | N.B. | N.B. | HV5-10-1 | KV3-15 |
| 349 | 300103 | Pentamer-specific | 0.0695  | N.N.     | 0.3875 | N.B.    | 0.7817 | N.B.   | N.B.   | N.B. | N.B. | N.B. | N.B. | HV3-21   | LV3-21 |
| 354 | 300103 | Pentamer-specific | 0.0017  | N.N.     | 0.842  | N.B.    | 0.8463 | N.B.   | N.B.   | N.B. | N.B. | N.B. | N.B. | HV3-15   | LV1-40 |
| 355 | 300103 | gHgL              | 0.0954  | 0.007076 | 0.2332 | 1.1258  | 1.2512 | 1.5004 | N.B.   | N.B. | N.B. | N.B. | N.B. | HV4-39   | LV5-45 |
| 359 | 300103 | gHgL              | 0.0218  | N.N.     | 0.0393 | 1.3695  | 1.6466 | 1.7011 | N.B.   | N.B. | N.B. | N.B. | N.B. | HV7-4-1  | KV1-5  |
| 360 | 300103 | gHgL              | 11.0605 | N.N.     | 1.185  | 0.2662  | 1.3217 | 0.2294 | N.B.   | N.B. | N.B. | N.B. | N.B. | HV3-30-3 | KV3-20 |
| 362 | 300103 | gHgL              | 0.3431  | N.N.     | 7.78   | 1.1267  | 1.1983 | 1.205  | N.B.   | N.B. | N.B. | N.B. | N.B. | HV3-23   | LV2-14 |
| 364 | 300103 | gHgL              | 0.1535  | N.N.     | 0.6481 | 0.7619  | 0.4665 | 0.6269 | N.B.   | N.B. | N.B. | N.B. | N.B. | HV3-15   | KV3-20 |
| 366 | 300103 | gHgL              | 1.9743  | 9.8349   | 6.051  | 0.3033  | 0.3406 | 0.3026 | N.B.   | N.B. | N.B. | N.B. | N.B. | HV1-24   | LV2-8  |
| 367 | 300103 | gHgL              | 3.0935  | N.N.     | 9.022  | 1.7088  | 0.8469 | 1.195  | N.B.   | N.B. | N.B. | N.B. | N.B. | HV3-7    | KV1-5  |
| 371 | 300103 | gHgL              | 12.4281 | N.N.     | 40.86  | 0.1235  | 0.1316 | 0.1267 | N.B.   | N.B. | N.B. | N.B. | N.B. | HV1-18   | KV3-15 |
| 378 | 300103 | gHgL              | 2.2338  | N.N.     | 10.602 | 0.7642  | 0.5723 | 0.7037 | N.B.   | N.B. | N.B. | N.B. | N.B. | HV1-69   | KV3-11 |
| 384 | 300103 | Pentamer-specific | 0.0042  | N.N.     | 0.3012 | N.B.    | 1.3257 | N.B.   | N.B.   | N.B. | N.B. | N.B. | N.B. | HV3-30   | LV2-14 |
| 406 | 300103 | gB                | N.N.    | N.N.     | 0.1677 | N.B.    | N.B.   | N.B.   | 1.5176 | N.B. | N.B. | N.B. | N.B. | HV1-3    | KV1-5  |
| 408 | 300103 | gB                | N.N.    | N.N.     | 0.3442 | N.B.    | N.B.   | N.B.   | 2.081  | N.B. | N.B. | N.B. | N.B. | HV3-23   | KV2-28 |

|     |        |                   |         |        |        |        |        |        |        |        |      |      |      |          |         |
|-----|--------|-------------------|---------|--------|--------|--------|--------|--------|--------|--------|------|------|------|----------|---------|
| 409 | 300103 | gB                | N.N.    | N.N.   | 0.2062 | N.B.   | N.B.   | N.B.   | 1.6066 | N.B.   | N.B. | N.B. | N.B. | HV2-70   | KV1-5   |
| 416 | 300103 | gB                | N.N.    | N.N.   | 0.0036 | N.B.   | N.B.   | N.B.   | 2.2911 | N.B.   | N.B. | N.B. | N.B. | HV3-48   | KV1-39  |
| 417 | 300103 | gB                | N.N.    | N.N.   | 0.0011 | N.B.   | N.B.   | N.B.   | 2.0741 | N.B.   | N.B. | N.B. | N.B. | HV1-2    | KV3D-20 |
| 420 | 300103 | gHgL              | N.N.    | N.N.   | 0.0306 | 0.0881 | 0.1236 | 0.0949 | N.B.   | N.B.   | N.B. | N.B. | N.B. | HV3-23   | LV3-21  |
| 422 | 300103 | gB                | N.N.    | N.N.   | 0.0094 | N.B.   | N.B.   | N.B.   | 2.0985 | N.B.   | N.B. | N.B. | N.B. | HV3-23   | LV1-40  |
| 432 | 300103 | gB                | N.N.    | N.N.   | 0.2137 | N.B.   | N.B.   | N.B.   | 0.7321 | N.B.   | N.B. | N.B. | N.B. | HV4-39   | KV1-5   |
| 443 | 300103 | gHgL              | N.N.    | N.N.   | 0.1411 | 0.0962 | 0.1876 | 0.334  | N.B.   | N.B.   | N.B. | N.B. | N.B. | HV6-1    | KV2-28  |
| 450 | 300103 | gB                | N.N.    | N.N.   | 0.1451 | N.B.   | N.B.   | N.B.   | 1.9976 | N.B.   | N.B. | N.B. | N.B. | HV4-34   | KV3D-20 |
| 457 | 300103 | gB                | N.N.    | N.N.   | 0.0094 | N.B.   | N.B.   | N.B.   | 2.58   | N.B.   | N.B. | N.B. | N.B. | HV1-18   | KV3-11  |
| 459 | 300103 | gB                | N.N.    | N.N.   | 0.0721 | N.B.   | N.B.   | N.B.   | 2.0956 | N.B.   | N.B. | N.B. | N.B. | HV3-21   | KV2-28  |
| 460 | 300103 | gB                | N.N.    | N.N.   | 0.1172 | N.B.   | N.B.   | N.B.   | 1.4445 | N.B.   | N.B. | N.B. | N.B. | HV3-23   | KV3D-20 |
| 461 | 300103 | gB                | N.N.    | N.N.   | 0.1289 | N.B.   | N.B.   | N.B.   | 1.7693 | N.B.   | N.B. | N.B. | N.B. | HV3-30   | KV1-17  |
| 486 | 300103 | gB                | N.N.    | N.N.   | 0.1284 | N.B.   | N.B.   | N.B.   | 2.5733 | N.B.   | N.B. | N.B. | N.B. | HV3-15   | KV3-20  |
| 488 | 300103 | gB                | N.N.    | N.N.   | 0.0708 | N.B.   | N.B.   | N.B.   | 2.5314 | N.B.   | N.B. | N.B. | N.B. | HV3-30   | KV1-39  |
| 532 | 300226 | gHgL              | 0.1088  | N.N.   | 2.135  | 0.0752 | 0.1908 | 0.0858 | N.B.   | N.B.   | N.B. | N.B. | N.B. | HV2-70   | KV4-1   |
| 534 | 300209 | Pentamer-specific | 0.0003  | N.N.   | N.B.   | N.B.   | 1.9209 | N.B.   | N.B.   | N.B.   | N.B. | N.B. | N.B. | HV4-61   | KV1-39  |
| 541 | 300209 | gHgL              | 0.0016  | 0.4276 | 0.0368 | 1.7782 | 1.6469 | 1.7024 | N.B.   | N.B.   | N.B. | N.B. | N.B. | HV1-18   | KV1-5   |
| 548 | 300209 | gHgL              | 0.0094  | 0.0495 | 0.0507 | 1.4294 | 0.5815 | 1.108  | N.B.   | N.B.   | N.B. | N.B. | N.B. | HV3-43D  | KV4-1   |
| 550 | 300209 | gHgL              | 0.0101  | 0.6236 | 0.2218 | 1.7478 | 1.2184 | 1.4047 | N.B.   | N.B.   | N.B. | N.B. | N.B. | HV3-30   | KV1-16  |
| 554 | 300209 | gHgL              | 0.0524  | 0.2438 | 0.297  | 1.6012 | 1.7643 | 1.8855 | N.B.   | N.B.   | N.B. | N.B. | N.B. | HV4-30-4 | KV3-20  |
| 557 | 300209 | gHgL              | 0.0277  | 0.3426 | 0.0869 | 1.711  | 1.9459 | 1.8725 | N.B.   | N.B.   | N.B. | N.B. | N.B. | HV4-59   | KV3-20  |
| 565 | 300209 | gHgL              | 0.2035  | N.N.   | 0.0424 | 1.3009 | 1.5636 | 1.7994 | N.B.   | N.B.   | N.B. | N.B. | N.B. | HV4-39   | KV3-20  |
| 567 | 300209 | gHgL              | 0.0232  | 0.1905 | 0.037  | 1.3658 | 1.535  | 1.5058 | N.B.   | N.B.   | N.B. | N.B. | N.B. | HV1-18   | KV1-5   |
| 570 | 300209 | gHgL              | 0.0576  | 1.2113 | 0.1995 | 0.5687 | 0.6752 | 0.9117 | N.B.   | N.B.   | N.B. | N.B. | N.B. | HV4-59   | KV3-20  |
| 571 | 300209 | gHgL              | 0.044   | 0.6538 | 0.0485 | 2.4861 | 1.2264 | 1.5988 | N.B.   | N.B.   | N.B. | N.B. | N.B. | HV1-3    | KV1-5   |
| 575 | 300209 | gHgL              | 0.2726  | 0.9637 | 0.3051 | 0.8986 | 0.5282 | 0.6539 | N.B.   | N.B.   | N.B. | N.B. | N.B. | HV1-2    | LV2-14  |
| 577 | 300209 | gHgL              | 0.0136  | 0.0944 | 0.0306 | 1.4698 | 1.4877 | 1.4061 | N.B.   | N.B.   | N.B. | N.B. | N.B. | HV1-18   | KV1-5   |
| 578 | 300209 | gHgL              | 10.6254 | N.N.   | 0.8068 | 1.6766 | 0.782  | 1.0124 | N.B.   | N.B.   | N.B. | N.B. | N.B. | HV3-11   | KV1-39  |
| 580 | 300209 | gB                | N.N.    | N.N.   | 2.457  | N.B.   | N.B.   | N.B.   | 2.5905 | N.B.   | N.B. | N.B. | N.B. | HV4-30-4 | KV1-39  |
| 582 | 300209 | gHgL              | 0.4026  | N.N.   | 0.9092 | 0.9987 | 0.8188 | 0.952  | N.B.   | N.B.   | N.B. | N.B. | N.B. | HV3-11   | KV3-11  |
| 583 | 300209 | Pentamer-specific | 0.0008  | N.N.   | 0.0099 | N.B.   | 0.5736 | N.B.   | N.B.   | N.B.   | N.B. | N.B. | N.B. | HV3-30   | LV1-36  |
| 584 | 300209 | pp65              | N.N.    | N.N.   | 22.29  | N.B.   | N.B.   | N.B.   | N.B.   | 1.9303 | N.B. | N.B. | N.B. | HV6-1    | KV3-20  |
| 591 | 300227 | gHgL              | 16.7953 | N.N.   | 7.313  | 2.5367 | 2.5709 | 0.2571 | N.B.   | N.B.   | N.B. | N.B. | N.B. | HV3-11   | KV3-20  |
| 594 | 300227 | gHgL              | 0.034   | 0.4837 | 0.0537 | 1.8652 | 1.6458 | 1.7893 | N.B.   | N.B.   | N.B. | N.B. | N.B. | HV1-69   | LV1-51  |
| 596 | 300227 | gHgL              | 0.0408  | 0.4529 | 0.0718 | 1.4036 | 1.6862 | 1.7124 | N.B.   | N.B.   | N.B. | N.B. | N.B. | HV1-69   | LV1-51  |
| 597 | 300226 | gHgL              | 1.7884  | 0.8107 | 0.3101 | 1.6832 | 1.7433 | 1.6632 | N.B.   | N.B.   | N.B. | N.B. | N.B. | HV5-51   | KV3-20  |
| 598 | 300226 | gHgL              | 0.1578  | N.N.   | 0.1906 | 1.1028 | 1.1431 | 1.1593 | N.B.   | N.B.   | N.B. | N.B. | N.B. | HV3-30   | LV1-47  |
| 604 | 300226 | gHgL              | 0.0604  | N.N.   | 6.929  | 1.2545 | 0.9995 | 1.0919 | N.B.   | N.B.   | N.B. | N.B. | N.B. | HV3-11   | LV1-40  |
| 605 | 300226 | Pentamer-specific | 0.0007  | N.N.   | 0.0413 | N.B.   | 1.0366 | N.B.   | N.B.   | N.B.   | N.B. | N.B. | N.B. | HV3-74   | KV2-30  |
| 609 | 300226 | gHgL              | 0.0494  | 1.033  | 1.243  | 1.944  | 0.9071 | 1.1852 | N.B.   | N.B.   | N.B. | N.B. | N.B. | HV3-33   | KV4-1   |
| 612 | 300226 | Pentamer-specific | 0.0012  | N.N.   | 1.015  | N.B.   | 1.8718 | N.B.   | N.B.   | N.B.   | N.B. | N.B. | N.B. | HV4-38-2 | LV1-44  |

|     |        |                   |        |         |        |        |        |        |      |      |      |      |      |          |         |
|-----|--------|-------------------|--------|---------|--------|--------|--------|--------|------|------|------|------|------|----------|---------|
| 613 | 300226 | gHgL              | 0.0254 | N.N.    | 0.0514 | 1.3285 | 1.3615 | 1.4375 | N.B. | N.B. | N.B. | N.B. | N.B. | HV1-18   | KV1-5   |
| 617 | 300226 | gHgL              | 5.4669 | N.N.    | 38.444 | 0.4968 | 0.5321 | 0.6921 | N.B. | N.B. | N.B. | N.B. | N.B. | HV1-8    | LV2-14  |
| 620 | 300226 | gHgL              | 0.0522 | 0.9641  | 1.139  | 1.4273 | 0.8436 | 1.1698 | N.B. | N.B. | N.B. | N.B. | N.B. | HV3-11   | LV2-14  |
| 622 | 300226 | gHgL              | 0.0224 | 1.968   | 0.1753 | 2.3886 | 0.9651 | 1.5685 | N.B. | N.B. | N.B. | N.B. | N.B. | HV3-30   | KV1-NL1 |
| 625 | 300226 | Pentamer-specific | 0.2915 | N.N.    | 4.877  | N.B.   | 2.5814 | N.B.   | N.B. | N.B. | N.B. | N.B. | N.B. | HV4-61   | KV1-NL1 |
| 628 | 300226 | gHgL              | 0.0683 | 0.1734  | 8.993  | 0.6631 | 0.5857 | 0.9472 | N.B. | N.B. | N.B. | N.B. | N.B. | HV3-21   | KV3-15  |
| 631 | 300226 | gHgL              | 0.0456 | 0.06779 | 0.1016 | 1.7662 | 0.6478 | 0.8443 | N.B. | N.B. | N.B. | N.B. | N.B. | HV3-9    | LV1-44  |
| 632 | 300226 | gHgL              | 0.1591 | N.N.    | 0.1195 | 2.1605 | 0.9973 | 1.3209 | N.B. | N.B. | N.B. | N.B. | N.B. | HV3-23   | KV1-12  |
| 635 | 300226 | gHgL              | 0.0467 | 0.05141 | 0.048  | 1.4206 | 1.3069 | 1.3269 | N.B. | N.B. | N.B. | N.B. | N.B. | HV1-18   | KV1-5   |
| 640 | 300226 | gHgL              | 0.0884 | 2.5     | 0.1273 | 0.6838 | 0.5778 | 0.9262 | N.B. | N.B. | N.B. | N.B. | N.B. | HV1-18   | KV1-39  |
| 643 | 300226 | Pentamer-specific | 0.0052 | N.N.    | 0.4422 | N.B.   | 1.1309 | N.B.   | N.B. | N.B. | N.B. | N.B. | N.B. | HV4-59   | KV3-20  |
| 645 | 300226 | gHgL              | 3.8346 | 0.2221  | 1.557  | 0.924  | 2.101  | 0.3471 | N.B. | N.B. | N.B. | N.B. | N.B. | HV3-23   | KV1-39  |
| 647 | 300226 | gHgL              | 0.0269 | 0.1684  | 0.0326 | 1.5217 | 1.7127 | 1.7762 | N.B. | N.B. | N.B. | N.B. | N.B. | HV1-18   | KV1-5   |
| 648 | 300226 | gHgL              | 0.0126 | 0.275   | 0.1862 | 1.7279 | 1.6777 | 1.7808 | N.B. | N.B. | N.B. | N.B. | N.B. | HV5-51   | KV3-15  |
| 651 | 300226 | gHgL              | 0.0195 | 0.058   | 0.1536 | 1.6967 | 1.5737 | 1.5755 | N.B. | N.B. | N.B. | N.B. | N.B. | HV5-51   | KV3-15  |
| 662 | 300226 | gHgL              | 0.028  | 0.2449  | 0.0351 | 1.4879 | 1.2911 | 1.3548 | N.B. | N.B. | N.B. | N.B. | N.B. | HV1-18   | KV1-5   |
| 666 | 300226 | gHgL              | 0.5608 | 1.5515  | 0.5586 | 1.8594 | 1.0698 | 1.3069 | N.B. | N.B. | N.B. | N.B. | N.B. | HV3-72   | LV1-44  |
| 668 | 300226 | gHgL              | 0.1535 | N.N.    | 0.1012 | 0.9601 | 0.8684 | 1.1664 | N.B. | N.B. | N.B. | N.B. | N.B. | HV1-18   | KV3-20  |
| 676 | 300226 | gHgL              | 0.0662 | 0.1953  | 0.0295 | 1.5392 | 1.1176 | 1.412  | N.B. | N.B. | N.B. | N.B. | N.B. | HV1-18   | KV1-5   |
| 682 | 300226 | gHgL              | 0.0789 | N.N.    | 0.2666 | 2.3888 | 2.003  | 2.5107 | N.B. | N.B. | N.B. | N.B. | N.B. | HV4-30-4 | LV1-40  |
| 685 | 300226 | Pentamer-specific | 8.5524 | 13.8    | 8.615  | N.B.   | 1.0519 | N.B.   | N.B. | N.B. | N.B. | N.B. | N.B. | HV4-59   | LV1-47  |
| 690 | 300226 | gHgL              | 3.2376 | N.N.    | 7.838  | 0.2912 | 1.2851 | 0.1247 | N.B. | N.B. | N.B. | N.B. | N.B. | HV4-38-2 | KV1-5   |
| 695 | 300226 | Pentamer-specific | 0.0016 | N.N.    | N.B.   | N.B.   | 0.4206 | N.B.   | N.B. | N.B. | N.B. | N.B. | N.B. | HV1-69   | LV3-21  |
| 702 | 300226 | Pentamer-specific | 0.0031 | N.N.    | 0.1083 | N.B.   | 0.9411 | N.B.   | N.B. | N.B. | N.B. | N.B. | N.B. | HV4-61   | LV3-19  |
| 703 | 300226 | gHgL              | 6.5587 | N.N.    | 5.967  | 2.353  | 2.1648 | 2.3613 | N.B. | N.B. | N.B. | N.B. | N.B. | HV3-48   | KV1-12  |
| 708 | 300226 | gHgL              | 1.5075 | N.N.    | 16.957 | 1.1493 | 1.1633 | 1.5828 | N.B. | N.B. | N.B. | N.B. | N.B. | HV1-69   | KV3-20  |
| 710 | 300226 | gHgL              | 0.0332 | 0.2164  | 0.3064 | 2.2154 | 1.9654 | 2.2759 | N.B. | N.B. | N.B. | N.B. | N.B. | HV3-11   | KV1-5   |
| 712 | 300226 | gHgL              | 0.1157 | 0.9273  | 0.199  | 2.5014 | 1.0927 | 1.4882 | N.B. | N.B. | N.B. | N.B. | N.B. | HV3-33   | KV1-39  |
| 714 | 300226 | Pentamer-specific | 0.0061 | N.N.    | 0.0553 | N.B.   | 0.4089 | N.B.   | N.B. | N.B. | N.B. | N.B. | N.B. | HV3-7    | LV1-44  |
| 716 | 300226 | gHgL              | 2.7148 | N.N.    | 33.579 | 1.8406 | 2.2862 | 0.2721 | N.B. | N.B. | N.B. | N.B. | N.B. | HV4-34   | LV1-44  |
| 722 | 300226 | gHgL              | 0.1452 | 0.0651  | 0.3781 | 1.3698 | 1.2584 | 1.2642 | N.B. | N.B. | N.B. | N.B. | N.B. | HV4-59   | LV2-8   |
| 730 | 300226 | gHgL              | 0.0248 | N.N.    | 2.175  | 1.2323 | 0.8763 | 1.2597 | N.B. | N.B. | N.B. | N.B. | N.B. | HV5-51   | KV3-15  |
| 735 | 300226 | Pentamer-specific | 0.0028 | N.N.    | 0.0323 | N.B.   | 0.8635 | N.B.   | N.B. | N.B. | N.B. | N.B. | N.B. | HV3-30   | LV2-14  |
| 742 | 300227 | gHgL              | 0.1003 | 1.612   | 0.1885 | 0.9805 | 0.74   | 1.1819 | N.B. | N.B. | N.B. | N.B. | N.B. | HV1-18   | KV3-11  |
| 743 | 300227 | gHgL              | 0.1485 | 2.2078  | 0.2498 | 0.6731 | 0.5885 | 1.0184 | N.B. | N.B. | N.B. | N.B. | N.B. | HV1-18   | KV3-11  |
| 746 | 300227 | Pentamer-specific | 0.0178 | N.N.    | 4.254  | N.B.   | 1.5185 | N.B.   | N.B. | N.B. | N.B. | N.B. | N.B. | HV3-7    | LV6-57  |
| 749 | 300227 | gHgL              | 0.0635 | 1.403   | 0.0399 | 1.2361 | 1.0504 | 1.1512 | N.B. | N.B. | N.B. | N.B. | N.B. | HV1-18   | KV1-5   |
| 756 | 300226 | gHgL              | 3.7371 | N.N.    | 7.296  | 1.0284 | 2.6371 | 0.3584 | N.B. | N.B. | N.B. | N.B. | N.B. | HV3-9    | KV1-39  |
| 760 | 300226 | gHgL              | 0.8709 | N.N.    | 0.4481 | 1.6464 | 0.6471 | 0.8465 | N.B. | N.B. | N.B. | N.B. | N.B. | HV2-70   | KV1-39  |
| 761 | 300226 | Pentamer-specific | 0.0192 | N.N.    | 0.0477 | N.B.   | 0.4963 | N.B.   | N.B. | N.B. | N.B. | N.B. | N.B. | HV3-15   | LV2-8   |

|     |        |                   |         |          |            |        |        |        |        |        |      |      |      |      |          |        |
|-----|--------|-------------------|---------|----------|------------|--------|--------|--------|--------|--------|------|------|------|------|----------|--------|
| 765 | 300226 | Pentamer-specific | 0.0007  | N.N.     | 0.0275     | N.B.   | 2.4454 | N.B.   | N.B.   | N.B.   | N.B. | N.B. | N.B. | N.B. | HV3-30   | LV3-21 |
| 767 | 300226 | gHgL              | 0.8022  | N.N.     | 1.63       | 0.1519 | 0.8209 | 0.5347 | N.B.   | N.B.   | N.B. | N.B. | N.B. | N.B. | HV3-30   | LV1-47 |
| 770 | 300226 | gHgL              | 0.5797  | N.N.     | 0.1877     | 2.0651 | 1.0911 | 1.3777 | N.B.   | N.B.   | N.B. | N.B. | N.B. | N.B. | HV1-69   | KV1-9  |
| 774 | 300226 | gHgL              | 0.0342  | 0.03922  | 0.0204     | 0.9512 | 0.7187 | 1.3853 | N.B.   | N.B.   | N.B. | N.B. | N.B. | N.B. | HV1-18   | KV1-5  |
| 780 | 300226 | gHgL              | 1.3532  | 5.305    | 27.231     | 1.1703 | 3.0972 | 0.3316 | N.B.   | N.B.   | N.B. | N.B. | N.B. | N.B. | HV1-69   | LV3-21 |
| 784 | 300226 | gHgL              | 7.8613  | N.N.     | 17.961     | 2.5152 | 2.3713 | 1.3106 | N.B.   | N.B.   | N.B. | N.B. | N.B. | N.B. | HV4-34   | KV4-1  |
| 790 | 300227 | gHgL              | 7.3002  | N.N.     | no-binding | 1.4885 | 2.9248 | 0.6584 | N.B.   | N.B.   | N.B. | N.B. | N.B. | N.B. | HV1-18   | KV2-28 |
| 792 | 300227 | Pentamer-specific | 0.0043  | N.N.     | 0.2758     | N.B.   | 2.4747 | N.B.   | N.B.   | N.B.   | N.B. | N.B. | N.B. | N.B. | HV2-5    | KV2-28 |
| 795 | 300227 | gHgL              | 0.0588  | 0.005949 | 4.426      | 2.9849 | 2.8806 | 2.9454 | N.B.   | N.B.   | N.B. | N.B. | N.B. | N.B. | HV3-11   | KV3-20 |
| 801 | 300227 | gHgL              | 0.0138  | 0.2573   | 0.0499     | 1.4362 | 1.3075 | 1.3485 | N.B.   | N.B.   | N.B. | N.B. | N.B. | N.B. | HV7-4-1  | KV1-5  |
| 806 | 300227 | gHgL              | 11.6764 | N.N.     | 30.204     | 1.0449 | 2.479  | 0.3645 | N.B.   | N.B.   | N.B. | N.B. | N.B. | N.B. | HV4-59   | KV3-20 |
| 807 | 300227 | gHgL              | 0.0053  | 0.23     | 0.0764     | 1.4443 | 0.9256 | 1.2295 | N.B.   | N.B.   | N.B. | N.B. | N.B. | N.B. | HV3-30-3 | KV3-11 |
| 813 | 300227 | gHgL              | 0.5826  | 0.04788  | 1.709      | 2.0118 | 0.9837 | 1.248  | N.B.   | N.B.   | N.B. | N.B. | N.B. | N.B. | HV1-2    | KV1-27 |
| 815 | 300227 | gHgL              | 0.7369  | N.N.     | 10.101     | 1.0325 | 1.8262 | 1.5473 | N.B.   | N.B.   | N.B. | N.B. | N.B. | N.B. | HV3-30-3 | KV1-12 |
| 816 | 300227 | gHgL              | 3.0649  | N.N.     | N.B.       | 0.9437 | 0.7206 | 0.9861 | N.B.   | N.B.   | N.B. | N.B. | N.B. | N.B. | HV1-18   | KV3-11 |
| 822 | 300227 | gHgL              | 0.1469  | 0.3532   | 0.7332     | 2.5373 | 2.182  | 2.3089 | N.B.   | N.B.   | N.B. | N.B. | N.B. | N.B. | HV5-51   | LV4-60 |
| 824 | 300227 | gHgL              | 0.0298  | 0.1974   | 9.275      | 0.6985 | 0.5519 | 1.1451 | N.B.   | N.B.   | N.B. | N.B. | N.B. | N.B. | HV3-30-3 | KV3-11 |
| 826 | 300226 | gHgL              | 0.1754  | 0.4      | 0.4424     | 0.6123 | 0.7321 | 0.9053 | N.B.   | N.B.   | N.B. | N.B. | N.B. | N.B. | HV4-34   | KV3-20 |
| 832 | 300226 | gHgL              | 0.0183  | 0.495    | 0.3546     | 1.2803 | 1.2314 | 1.8208 | N.B.   | N.B.   | N.B. | N.B. | N.B. | N.B. | HV4-31   | KV3-11 |
| 839 | 300226 | gHgL              | 12.2331 | N.N.     | 14.72      | 0.4586 | 1.4962 | 0.2512 | N.B.   | N.B.   | N.B. | N.B. | N.B. | N.B. | HV4-59   | KV3-20 |
| 843 | 300226 | gHgL              | 0.0291  | 0.1334   | 0.0241     | 0.9843 | 0.9947 | 1.3037 | N.B.   | N.B.   | N.B. | N.B. | N.B. | N.B. | HV1-18   | KV1-5  |
| 845 | 300209 | gB                | 49.3    | N.N.     | 0.7        | N.B.   | N.B.   | N.B.   | 1.145  | N.B.   | N.B. | N.B. | N.B. | N.B. | HV4-61   | KV1-39 |
| 850 | 300209 | pp65              | N.N.    | N.N.     | 0.092      | N.B.   | N.B.   | N.B.   | N.B.   | 1.9322 | N.B. | N.B. | N.B. | N.B. | HV3-21   | KV1-5  |
| 851 | 300209 | gHgL              | N.N.    | N.N.     | 0.0121     | 0.3592 | 0.331  | 0.3468 | N.B.   | N.B.   | N.B. | N.B. | N.B. | N.B. | HV3-30-3 | LV3-21 |
| 855 | 300209 | gHgL              | 0.0936  | 0.2281   | 0.1244     | 1.3132 | 1.1921 | 1.6379 | N.B.   | N.B.   | N.B. | N.B. | N.B. | N.B. | HV4-34   | LV2-14 |
| 858 | 300209 | gB                | 37      | 38       | 0.0075     | N.B.   | N.B.   | N.B.   | 1.1496 | N.B.   | N.B. | N.B. | N.B. | N.B. | HV4-30-4 | KV3-20 |
| 862 | 300209 | gB                | 11.8    | 14.7     | 0.043      | N.B.   | N.B.   | N.B.   | 1.1493 | N.B.   | N.B. | N.B. | N.B. | N.B. | HV5-51   | LV2-14 |
| 864 | 300227 | pp65              | N.N.    | N.N.     | 0.0272     | N.B.   | N.B.   | N.B.   | N.B.   | 1.2851 | N.B. | N.B. | N.B. | N.B. | HV3-74   | LV2-14 |
| 865 | 300227 | gHgL              | N.N.    | N.N.     | 0.1886     | 0.5012 | 0.5719 | 0.7204 | N.B.   | N.B.   | N.B. | N.B. | N.B. | N.B. | HV3-9    | KV1-39 |
| 867 | 300227 | pp65              | N.N.    | N.N.     | 0.0199     | N.B.   | N.B.   | N.B.   | N.B.   | 1.4502 | N.B. | N.B. | N.B. | N.B. | HV3-11   | KV1-39 |
| 868 | 300227 | gHgL              | 1.2077  | 1.2023   | 0.4316     | 2.2245 | 0.8613 | 1.3267 | N.B.   | N.B.   | N.B. | N.B. | N.B. | N.B. | HV3-30   | KV1-5  |
| 873 | 300227 | pp65              | N.N.    | N.N.     | 0.0047     | N.B.   | N.B.   | N.B.   | N.B.   | 0.9691 | N.B. | N.B. | N.B. | N.B. | HV1-69-2 | LV3-19 |
| 874 | 300227 | gB                | N.N.    | N.N.     | 0.0665     | N.B.   | N.B.   | N.B.   | 1.0769 | N.B.   | N.B. | N.B. | N.B. | N.B. | HV4-39   | KV3-20 |
| 883 | 300227 | gHgL              | N.N.    | N.N.     | 0.067      | 1.6863 | 0.9975 | 0.9519 | N.B.   | N.B.   | N.B. | N.B. | N.B. | N.B. | HV4-30-4 | KV1-39 |
| 885 | 300227 | pp65              | N.N.    | N.N.     | 0.0195     | N.B.   | N.B.   | N.B.   | N.B.   | 1.4498 | N.B. | N.B. | N.B. | N.B. | HV4-34   | KV1-39 |
| 891 | 300227 | pp65              | N.N.    | N.N.     | 0.3862     | N.B.   | N.B.   | N.B.   | N.B.   | 1.5731 | N.B. | N.B. | N.B. | N.B. | HV1-18   | LV1-47 |
| 892 | 300227 | gB                | N.N.    | N.N.     | 0.0007     | N.B.   | N.B.   | N.B.   | 1.1129 | N.B.   | N.B. | N.B. | N.B. | N.B. | HV4-38-2 | KV3-11 |
| 896 | 300227 | pp65              | N.N.    | N.N.     | 0.0019     | N.B.   | N.B.   | N.B.   | N.B.   | 1.5994 | N.B. | N.B. | N.B. | N.B. | HV3-23   | LV1-40 |
| 897 | 300227 | pp65              | N.N.    | N.N.     | 0.005      | N.B.   | N.B.   | N.B.   | N.B.   | 1.5214 | N.B. | N.B. | N.B. | N.B. | HV3-23   | LV1-40 |
| 898 | 300227 | pp65              | N.N.    | N.N.     | 0.0036     | N.B.   | N.B.   | N.B.   | N.B.   | 1.5441 | N.B. | N.B. | N.B. | N.B. | HV3-23   | LV1-40 |

|      |        |      |         |        |        |        |        |        |        |        |      |      |      |          |        |
|------|--------|------|---------|--------|--------|--------|--------|--------|--------|--------|------|------|------|----------|--------|
| 899  | 300227 | pp65 | N.N.    | N.N.   | 0.0204 | N.B.   | N.B.   | N.B.   | N.B.   | 2.147  | N.B. | N.B. | N.B. | HV4-39   | KV3-20 |
| 904  | 300226 | pp65 | N.N.    | N.N.   | 0.0154 | N.B.   | N.B.   | N.B.   | N.B.   | 1.1459 | N.B. | N.B. | N.B. | HV4-34   | LV1-44 |
| 905  | 300226 | gHgL | N.N.    | N.N.   | 0.4358 | 2.7971 | 3.1183 | 1.4017 | N.B.   | N.B.   | N.B. | N.B. | N.B. | HV1-8    | LV2-23 |
| 913  | 300226 | gHgL | 0.9055  | N.N.   | 0.2534 | 1.8363 | 0.929  | 1.1876 | N.B.   | N.B.   | N.B. | N.B. | N.B. | HV3-23   | LV1-47 |
| 921  | 300226 | gHgL | 3.7212  | N.N.   | 4.782  | 0.6821 | 0.5673 | 0.9507 | N.B.   | N.B.   | N.B. | N.B. | N.B. | HV4-4    | KV3-11 |
| 928  | 300226 | gB   | N.N.    | N.N.   | 0.0089 | N.B.   | N.B.   | N.B.   | 1.5421 | N.B.   | N.B. | N.B. | N.B. | HV1-69   | LV3-21 |
| 932  | 300226 | pp65 | N.N.    | N.N.   | 0.052  | N.B.   | N.B.   | N.B.   | N.B.   | 1.3605 | N.B. | N.B. | N.B. | HV1-69   | KV1-8  |
| 936  | 300209 | gB   | N.N.    | N.N.   | 0.1184 | N.B.   | N.B.   | N.B.   | 1.4326 | N.B.   | N.B. | N.B. | N.B. | HV4-59   | LV3-9  |
| 937  | 300209 | pp65 | N.N.    | N.N.   | 0.1792 | N.B.   | N.B.   | N.B.   | N.B.   | 1.919  | N.B. | N.B. | N.B. | HV1-69   | KV1-16 |
| 940  | 300209 | gHgL | 0.029   | 0.8679 | 0.0323 | 2.4104 | 1.1589 | 1.4672 | N.B.   | N.B.   | N.B. | N.B. | N.B. | HV1-69   | KV1-5  |
| 945  | 300209 | pp65 | N.N.    | N.N.   | 0.5114 | N.B.   | N.B.   | N.B.   | N.B.   | 1.2065 | N.B. | N.B. | N.B. | HV4-30-4 | KV1-39 |
| 955  | 300209 | gB   | N.N.    | N.N.   | 0.0055 | N.B.   | N.B.   | N.B.   | 1.132  | N.B.   | N.B. | N.B. | N.B. | HV4-61   | KV4-1  |
| 957  | 300209 | gB   | N.N.    | N.N.   | 0.0582 | N.B.   | N.B.   | N.B.   | 1.1432 | N.B.   | N.B. | N.B. | N.B. | HV4-30-4 | KV3-20 |
| 958  | 300227 | pp65 | N.N.    | N.N.   | 0.081  | N.B.   | N.B.   | N.B.   | N.B.   | 1.3832 | N.B. | N.B. | N.B. | HV1-69   | KV3-15 |
| 959  | 300227 | gB   | N.N.    | N.N.   | 0.3717 | N.B.   | N.B.   | N.B.   | 1.1218 | N.B.   | N.B. | N.B. | N.B. | HV1-69   | KV3-20 |
| 960  | 300227 | gHgL | 0.8357  | N.N.   | 1.617  | 1.0297 | 0.9264 | 1.0831 | N.B.   | N.B.   | N.B. | N.B. | N.B. | HV1-69   | KV3-20 |
| 964  | 300227 | pp65 | N.N.    | N.N.   | 0.054  | N.B.   | N.B.   | N.B.   | N.B.   | 1.2191 | N.B. | N.B. | N.B. | HV3-9    | LV1-44 |
| 966  | 300227 | pp65 | N.N.    | N.N.   | 0.2665 | N.B.   | N.B.   | N.B.   | N.B.   | 1.5664 | N.B. | N.B. | N.B. | HV4-34   | KV1-39 |
| 977  | 300226 | pp65 | N.N.    | N.N.   | 0.3174 | N.B.   | N.B.   | N.B.   | N.B.   | 1.9187 | N.B. | N.B. | N.B. | HV4-31   | LV3-1  |
| 980  | 300226 | gB   | N.N.    | N.N.   | 0.2362 | N.B.   | N.B.   | N.B.   | 1.196  | N.B.   | N.B. | N.B. | N.B. | HV3-64   | LV3-21 |
| 988  | 300226 | gHgL | N.N.    | N.N.   | 0.1753 | 0.8257 | 0.6185 | 0.6347 | N.B.   | N.B.   | N.B. | N.B. | N.B. | HV3-30-3 | LV1-40 |
| 989  | 300226 | gHgL | 2.7254  | N.N.   | 1.358  | 1.1336 | 1.2059 | 1.2315 | N.B.   | N.B.   | N.B. | N.B. | N.B. | HV4-59   | LV1-44 |
| 991  | 300226 | pp65 | N.N.    | N.N.   | 0.0146 | N.B.   | N.B.   | N.B.   | N.B.   | 1.3241 | N.B. | N.B. | N.B. | HV3-15   | LV2-14 |
| 1023 | 300226 | pp65 | N.N.    | N.N.   | 0.0236 | N.B.   | N.B.   | N.B.   | N.B.   | 2.1092 | N.B. | N.B. | N.B. | HV1-18   | LV4-60 |
| 1026 | 300226 | gB   | N.N.    | N.N.   | 0.025  | N.B.   | N.B.   | N.B.   | 1.0998 | N.B.   | N.B. | N.B. | N.B. | HV3-23   | KV1-9  |
| 1034 | 300226 | gB   | N.N.    | N.N.   | 0.091  | N.B.   | N.B.   | N.B.   | 1.2725 | N.B.   | N.B. | N.B. | N.B. | HV3-33   | LV3-21 |
| 1040 | 300226 | gHgL | 0.8     | 1.3652 | 3.45   | 0.6542 | 0.5672 | 1.1148 | N.B.   | N.B.   | N.B. | N.B. | N.B. | HV4-61   | KV3-20 |
| 1058 | 300226 | gB   | N.N.    | N.N.   | 0.001  | N.B.   | N.B.   | N.B.   | 1.1812 | N.B.   | N.B. | N.B. | N.B. | HV6-1    | KV4-1  |
| 1071 | 300226 | pp65 | N.N.    | N.N.   | 0.0061 | N.B.   | N.B.   | N.B.   | N.B.   | 1.2254 | N.B. | N.B. | N.B. | HV3-15   | LV1-51 |
| 1100 | 300226 | gB   | N.N.    | N.N.   | 0.2943 | N.B.   | N.B.   | N.B.   | 1.8229 | N.B.   | N.B. | N.B. | N.B. | HV3-11   | LV3-21 |
| 1101 | 300226 | gHgL | 0.4885  | N.N.   | 0.0248 | 0.5256 | 0.3993 | 0.1846 | N.B.   | N.B.   | N.B. | N.B. | N.B. | HV4-30-4 | KV3-20 |
| 1106 | 300226 | gHgL | 16.4709 | N.N.   | 2.781  | 0.4126 | 0.8419 | 0.2644 | N.B.   | N.B.   | N.B. | N.B. | N.B. | HV3-7    | LV2-14 |
| 1114 | 300226 | gHgL | 2.6734  | N.N.   | 8.577  | 0.7015 | 2.5859 | 0.306  | N.B.   | N.B.   | N.B. | N.B. | N.B. | HV4-39   | LV1-44 |

<sup>1</sup> N.N. indicates no neutralizing activity.

<sup>2</sup> N.B. indicates no binding to the HCMV virion or HCMV antigens

**Supplementary Table 4.** Consolidation of binding site of pentamer-specific reference antibodies from two studies by pairwise competition ELISA<sup>1</sup>

| Antibody 1 <sup>2</sup> | Target               | Pairwise inhibition (%) with reference antibody 2 <sup>3</sup> |           |      |           |
|-------------------------|----------------------|----------------------------------------------------------------|-----------|------|-----------|
|                         |                      | 1-103                                                          | 1-125     | 2-18 | 57.4      |
| 4N10                    | UL130/UL131A         | 7                                                              | 15        | -17  | -20       |
| 10P3                    | UL130/UL131A         | 5                                                              | 2         | -22  | 2         |
| 8I21                    | gHgL/UL128/UL130     | 3                                                              | 10        | -22  | 26        |
| 7I13                    | UL128/ UL130/ UL131A | 17                                                             | 22        | -5   | 5         |
| 2C12                    | UL128/ UL130/ UL131A | 15                                                             | <b>85</b> | -11  | 15        |
| 15D8                    | UL128                | 2                                                              | 5         | -8   | <b>69</b> |
| 10F7                    | UL130/UL131A         | 7                                                              | -1        | -10  | 20        |

<sup>1</sup>ELISA plates coated with recombinant soluble gH pentamer were incubated with 3 µg/ml antibody 1 or PBS control prior exposure to 3 µg/ml biotinylated antibody 2. If antibody 1 and 2 compete for binding, the binding of antibody 2 will be decreased by the pretreated antibody 1 in comparison to the PBS control. The percentage of inhibition for each antibody 2 was calculated by normalizing the signal decrease to the binding signal in PBS control;

<sup>2</sup>Pentamer-specific antibodies from reference <sup>2</sup>;

<sup>3</sup>Pentamer-specific antibodies from reference <sup>3</sup>.

**Supplementary Table 5.** Mapping of binding sites of V160 induced pentamer-specific antibodies<sup>1</sup>

| Antibody 1 <sup>2</sup> | Pairwise inhibition (%) with reference antibody 2 <sup>3</sup> |                 |      |      |           |      |      |      |           |
|-------------------------|----------------------------------------------------------------|-----------------|------|------|-----------|------|------|------|-----------|
|                         | 15D8                                                           | 10F7            | 4N10 | 10P3 | 2C12      | 7I13 | 8I21 | 2-18 | 1-103     |
| 349                     | <b>74</b>                                                      | -2              | 2    | 4    | 0         | 0    | 1    | -1   | 5         |
| 583                     | <b>69</b>                                                      | -6              | -25  | 20   | 9         | -6   | 2    | 20   | 22        |
| 761                     | <b>60</b>                                                      | -9              | 1    | 0    | -2        | -5   | -8   | -9   | 3         |
| 27                      | <b>58</b>                                                      | 3               | 5    | 11   | -3        | 6    | -1   | -2   | 5         |
| 765                     | 9                                                              | <b>55</b>       | -23  | -11  | 28        | -10  | -16  | -4   | 13        |
| 612                     | 5                                                              | <b>51</b>       | -19  | 0    | 12        | -14  | -9   | 8    | 20        |
| 298                     | 3                                                              | <b>52</b>       | -19  | -29  | 10        | -14  | -23  | -11  | 8         |
| 354                     | -2                                                             | 0               | -1   | -1   | <b>84</b> | 5    | -3   | -5   | 17        |
| 695                     | 4                                                              | ND <sup>4</sup> | ND   | ND   | <b>89</b> | ND   | ND   | 9    | -1        |
| 315                     | 31                                                             | 7               | 11   | 7    | 4         | 9    | 12   | 4    | <b>54</b> |
| 334                     | 24                                                             | 1               | -22  | -20  | 4         | -6   | -25  | -24  | <b>55</b> |
| 735                     | 17                                                             | -7              | 3    | 2    | 1         | 15   | -7   | -1   | <b>58</b> |
| 605                     | -13                                                            | ND              | ND   | ND   | 7         | ND   | ND   | -4   | <b>81</b> |
| 702                     | 24                                                             | ND              | ND   | ND   | 1         | ND   | ND   | -7   | <b>70</b> |
| 6                       | 23                                                             | -2              | 8    | 8    | -2        | 12   | 1    | 5    | 6         |
| 714                     | 22                                                             | 4               | -2   | 0    | 1         | 8    | -12  | -6   | 12        |
| 384                     | 20                                                             | -1              | 4    | 10   | -5        | 6    | 0    | 12   | 22        |
| 746                     | 11                                                             | -4              | 3    | 3    | 2         | 5    | 4    | -1   | 9         |
| 250                     | 10                                                             | 5               | -17  | -21  | 18        | -5   | -21  | -10  | 11        |
| 625                     | 4                                                              | 3               | -29  | -23  | 5         | -15  | -24  | -17  | 8         |
| 305                     | 1                                                              | -3              | 18   | 2    | -6        | 1    | -1   | 4    | 1         |
| 643                     | -1                                                             | 1               | 2    | 1    | -1        | -2   | -2   | 0    | -2        |
| 685                     | -2                                                             | -1              | -26  | -20  | 3         | -20  | -24  | -12  | 8         |
| 20                      | -3                                                             | -3              | 4    | 1    | -1        | 1    | -3   | 6    | 0         |



<sup>1</sup>ELISA plates coated with recombinant soluble gH pentamer were incubated with 3 µg/ml antibody 1 or PBS control prior exposure to 3 µg/ml biotinylated antibody 2. If antibody 1 and 2 compete for binding, the binding of antibody 2 will be decreased by the pretreated antibody 1 in comparison to the PBS control. The percentage of inhibition for each antibody 2 was calculated by normalizing the signal decrease to the binding signal in PBS control

<sup>2</sup>V160 induced pentamer-specific antibodies;

<sup>3</sup>Reference pentamer-specific antibodies of known binding site;

<sup>4</sup>ND indicates the inhibition was not determined.

**Supplementary Table 6.** Mapping of binding sites of V160 induced gHgL antibodies<sup>a</sup>

| Antibody 1 <sup>b</sup> | Reference antibody 2 <sup>c</sup> | Pairwise inhibition (%) |
|-------------------------|-----------------------------------|-------------------------|
| 3                       | 3-16                              | 64                      |
| 9                       | 3-16                              | 85                      |
| 11                      | 3-16                              | 66                      |
| 12                      | 3-16                              | 77                      |
| 14                      | 3-16                              | 84                      |
| 17                      | 3-16                              | 79                      |
| 20                      | 3-16                              | 60                      |
| 25                      | 3-16                              | 72                      |
| 244                     | 3-16                              | 85                      |
| 300                     | 3-16                              | 79                      |
| 541                     | 3-16                              | 91                      |
| 567                     | 3-16                              | 91                      |
| 570                     | 3-16                              | 82                      |
| 571                     | 3-16                              | 91                      |
| 577                     | 3-16                              | 87                      |
| 622                     | 3-16                              | 86                      |
| 4                       | 3-16                              | 80                      |
| 635                     | 3-16                              | 82                      |
| 640                     | 3-16                              | 84                      |
| 647                     | 3-16                              | 78                      |
| 8                       | 3-16                              | 87                      |
| 662                     | 3-16                              | 82                      |
| 676                     | 3-16                              | 73                      |
| 712                     | 3-16                              | 89                      |
| 749                     | 3-16                              | 71                      |
| 774                     | 3-16                              | 94                      |
| 801                     | 3-16                              | 56                      |

|     |         |    |
|-----|---------|----|
| 826 | 3-16    | 56 |
| 940 | 3-16    | 78 |
| 5   | 13H11   | 76 |
| 37  | 13H11   | 71 |
| 267 | 13H11   | 68 |
| 594 | 13H11   | 86 |
| 596 | 13H11   | 85 |
| 742 | 13H11   | 94 |
| 743 | 13H11   | 93 |
| 832 | 13H11   | 86 |
| 921 | 13H11   | 62 |
| 41  | 13H11   | 69 |
| 41  | MSL-109 | 60 |
| 26  | MSL-109 | 52 |
| 666 | MSL-109 | 77 |
| 989 | MSL-109 | 51 |
| 855 | 3G16    | 76 |

<sup>a</sup>ELISA plates coated with recombinant soluble gH/gL were incubated with 3 µg/ml antibody 1 or PBS control prior exposure to 3 µg/ml biotinylated antibody 2. If antibody 1 and 2 compete for binding, the binding of antibody 2 will be decreased by the pretreated antibody 1 in comparison to the PBS control. The percentage of inhibition for each antibody 2 was calculated by normalizing the signal decrease to the binding signal in PBS control;

<sup>b</sup>V160 induced gHgL antibodies;

<sup>c</sup>Reference gHgL antibodies of known binding site <sup>3, 4, 5</sup>.

**Supplementary Dataset.** The individual data points of the figures, the original uncutted gel pictures and the antibody sequences .

## Reference

1. DeKosky BJ, *et al.* In-depth determination and analysis of the human paired heavy- and light-chain antibody repertoire. *Nature medicine* **21**, 86-91 (2015).
2. Ciferri C, *et al.* Antigenic Characterization of the HCMV gH/gL/gO and Pentamer Cell Entry Complexes Reveals Binding Sites for Potently Neutralizing Human Antibodies. *PLoS pathogens* **11**, e1005230 (2015).
3. Ha S, *et al.* Neutralization of Diverse Human Cytomegalovirus Strains Conferred by Antibodies Targeting Viral gH/gL/pUL128-131 Pentameric Complex. *Journal of virology* **91**, (2017).
4. Macagno A, *et al.* Isolation of human monoclonal antibodies that potently neutralize human cytomegalovirus infection by targeting different epitopes on the gH/gL/UL128-131A complex. *Journal of virology* **84**, 1005-1013 (2010).
5. Fouts AE, *et al.* Mechanism for neutralizing activity by the anti-CMV gH/gL monoclonal antibody MSL-109. *Proceedings of the National Academy of Sciences of the United States of America* **111**, 8209-8214 (2014).
